# Supplementary material
Source: publisher figshare collection journal article supplement (https://asha.figshare.com/articles/dataset/_/8956775)
Supplement: Supplementary file 1 [file 1]

## Sheet: iOS
Supplemental Material, Deshpande & Shimunova, "A Comprehensive Evaluation of Tinnitus Apps," AJA, https://doi.org/10.1044/2019_AJA-18-0135
Supplemental Material S1. List of tinnitus apps and associated features available on the iOS mobile platform.
Name of the App	Name of the Developer	Free/Paid	Cost	Tinnitus Education, Awareness, and Prevention			Tinnitus Assessment and Measurement											Tinnitus Management
				Tinnitus information	Noise measurement	Hearing test	Pitch				Loudness		Laterality	Type	Annoyance	Questionnaire	Timer	Sound library										Sound library features																				Other features
							Primary	Secondary	Bandwidth	Modulation	Match	Balance						Color noise/NBN	Natural/enviromental sounds	Mechanical sounds	Binaural beats	Physiological sounds	Puretones	Anti-phase sounds	Music	Notched stimuli	Breathing/relaxation exercises	Sound record/import	Sound export	Sound combination	Soundscape save	Volume control of individual sounds	Volume control	Volume balance	Pitch control	Pitch modulation	Amplitude modulation	Equalizer	Monoaural/binaural presentation	Playlist	Loop playlist	Shuffle	Timer	Usage statistics	Alarm	Burst	Burst duration	Mininum masking level	Calibration
Whist - Tinnitus Relief (FREE/LITE)	Sensimetrics Corporation	Free		Present			Present				Present	Present	Present	Present				Present					Present										Present	Present	Present								Present					Present
Oticon Tinnitus Sound	Oticon A/S	Free		Present														Present	Present								Present	Present
ReSound Relief - for people with tinnitus	ReSound	Free		Present														Present	Present						Present		Present	Present		Present	Present		Present	Present									Present	Present
Starkey Relax	Starkey Laboratories	Free		Present														Present	Present	Present					Present								Present		Present	Present	Present						Present
Tinnitus Balance	Phonak	Free		Present														Present	Present						Present			Present													Present		Present	Present
Tinnitus Therapy Lite	Sound-Oasis	Free		Present														Present	Present	Present													Present										Present
Levo	Otoharmonics Corporation	Free														Present
myNoise	myNoise BVBA	Free																Present	Present	Present	Present									Present	Present		Present		Present								Present		Present				Present
Sleep Bug: White Noise Soundscapes & Music Box	Arnt-Henning Moberg	Free																Present	Present	Present					Present					Present			Present										Present
Soothing Sounds Lite - Sound Ambience for Relaxing, Sleep and Meditation	Lost Ego Studios Limited	Free																Present	Present	Present										Present													Present		Present
Beltone Tinnitus Calmer	Beltone	Free		Present														Present	Present						Present		Present	Present		Present	Present		Present	Present									Present	Present
Link Tinnitus Sound	Oticon A/S	Free		Present														Present	Present								Present	Present
Ambient Sounds	Sebastian Hojas	Free																	Present	Present										Present			Present
Chill: Sleep, relax and focus with soothing white noise sounds	Dave Cheng	Free																	Present	Present					Present								Present										Present
Decibel Ultra by Patrick Schaefer	Patrick Schaefer	Free			Present
Decibels for iOS	Aleksander Azizi	Free			Present
EarPlayer	Peter Schorn	Free		Present																						Present		Present													Present
Free Nature Sounds for Yoga, Meditation and Sleep	Volodymyr Oliennikov	Free																	Present	Present													Present
Free White Noise: Natural sounds to block noise, help sleep & focus	Phase4 Mobile	Free																Present	Present	Present										Present	Present		Present
Just Noise Simply Free White Sound Machine for Focus and Relaxation	Infinite Wave Media, LLC	Free																Present		Present										Present	Present		Present
My Mèniére's HD	Rick Doornhein	Free		Present
Relaxiness - Relax with Rain Sounds	Lassi Lehikoinen	Free																	Present																								Present
Relieve Your Tinnitus	Tashlik	Free		Present
Sleep Better: Relaxing Waves	amygdra ltd	Free																	Present																								Present
Sound Relaxed	S COX	Free		Present														Present	Present									Present															Present
TaoMix 2 - Relax, Sleep Better with Nature Sounds	inookta studio inc.	Free																	Present		Present							Present		Present	Present												Present
tinnease Tinnitus Treatment	Daniel Wuerstl	Free					Present				Present		Present													Present		Present																Present
TinniTranquil Tinnitus Treatment Music Player	Florian Student	Free																								Present		Present					Present
Tinnitus Alleviator	Neuromonics Inc.	Free				Present												Present							Present
Tinnitus Relief Sound Masking System – Audio Treatment to Cure Ringing in Ears	Rehegoo	Free		Present														Present	Present	Present					Present					Present			Present										Present
Tinnitus Treatment #1 Tinnitus Cure For Ringing In Ears	Gyan Sahoo	Free		Present
White Noise Free: sounds for sleep and relaxation	TMSOFT	Free																Present	Present	Present		Present			Present			Present		Present	Present		Present	Present	Present					Present	Present		Present		Present
White Noise HD	White Noise HD by UP ALL NIGHT, LLC	Free																Present															Present
Tinnitunes- Tinnitus Relief Music App	Philip Houseley	Free		Present														Present					Present										Present
Veil- Concentration and relaxation sounds	Timothy Belfield	Free																Present	Present	Present										Present	Present		Present
Widex Zen, Tinnitus Management	Widex A/S	Free		Present														Present	Present								Present						Present	Present					Present				Present
Hearing Test & Ear Age Test	Yuichi Sakashita	Free
AudioNotch	AudioNotch Inc	Free		Present			Present				Present			Present												Present
White Noise free- Meditation to Relax Sleep Best	Kaile Zhang	Free																Present	Present	Present					Present																Present	Present
White Noise app Sleepy Sounds Anti anxiety free	Alisa Unzhakova	Free																	Present						Present
Noise Generator: brown, pink, white, blue, violet	TMSOFT	Free																Present															Present
Sleep Like a Baby	Secret Box	Free																Present	Present	Present		Present			Present																		Present
Noise Machine- White Noise & Beyond	AWAVE INTERACTIVE	Free																Present
Noise Machine- White & Colored Noise Generator	Rory Buckley	Free																Present															Present										Present
Tinnitus Sound Finder	Desyncra Tinnitus Limited	Free					Present							Present
White Noise Sleep Pillow Sound	FITNESS22 LTD	Free																	Present	Present					Present						Present	Present	Present										Present
Deep Sleep Fan for Bedtime	Kitefaster LLC	Free		Present																Present													Present				Present						Present
Relax Rainy Sounds 3D	Rukshan Marapana	Free																	Present	Present					Present					Present		Present											Present
Whist – Tinnitus Relief	Sensimetrics Corporation	Paid	1.99	Present			Present				Present	Present	Present	Present				Present					Present										Present	Present	Present								Present
Overcome Tinnitus Self-Hypnosis by Glenn Harrold	Glenn Harrold- Diviniti Publishing Ltd	Paid	3.99																								Present
Soundness	Ida Leonhard	Paid	5.99																								Present
Stop Tinnitus! Tinnitus Relief	Hypnosis by Get on Apps!	Paid	2.99																						Present		Present			Present			Present
Tinnitus Relief by Helena Löwen-Åberg	Helena Löwen-Åberg by Develant Technologies AB	Paid	2.99	Present																							Present
Decibel Ultra pro	Patrick Schaefer	Paid	7.99		Present
Ear Disorders: Inner	Blue Tree Publishing, Inc.	Paid	4.99	Present
Enlighten - Relax, sleep, meditate to wave, wind, rain, forest, ocean and natural sounds and calm your mind.	Prithiv Dev Devendran	Paid	0.99																Present	Present					Present					Present			Present										Present
iSuppress Premium Edition	Brad May	Paid	0.99															Present															Present		Present		Present
iTinnitus	Calabughi Entertainment Games	Paid	5.99	Present		Present								Present	Present	Present			Present
Just Noise #1 White Noise Machine	Infinite Wave Media, LLC	Paid	0.99															Present			Present		Present							Present	Present		Present
MultiSound	Rene Fouquet	Paid	2.99																	Present																							Present
myTinnitus Professional Edition	Brad May	Paid	0.99	Present			Present	Present		Present	Present	Present		Present			Present
Nature Sleep Sounds Pro	Volodymyr Oliennikov	Paid	0.99																Present														Present
Noisli	Noisli Ltd	Paid	0.99															Present	Present	Present										Present													Present
Offwhite	Bxtel LLC	Paid	0.99															Present								Present				Present			Present
Relax Fan	PopMartian	Paid	1.99										Present						Present	Present										Present													Present
Serene Ears	Bxtel LLC	Paid	0.99															Present	Present	Present													Present				Present
SimplyRain	Reactor LLC	Paid	0.99																Present														Present				Present						Present
Sleep Bug Pro: White Noise Soundscapes & Music Box	Arnt-Henning Moberg	Paid	1.99																Present	Present					Present					Present													Present
Sleep Mask - White Noise for Sleep and Relaxation	Ultabit, LLC	Paid	1.99															Present															Present										Present
Sleep Well Baby Sounds - Sleep Aid For Babies	Joachim Bruns	Paid	0.99																	Present													Present										Present
Soothing Sounds - Sound Ambience for Relaxing, Sleep and Meditation	Lost Ego Studios Limited	Paid	3.99															Present	Present		Present	Present			Present					Present	Present		Present										Present		Present
Sound Therapy - Relax	Lisa Burns	Paid	3.99															Present	Present											Present			Present
Suono Noise Masking - Soothing white, pink, and brownian noise to aid power napping, meditating, chilling and concentrating	Joy Renee	Paid	0.99															Present															Present				Present						Present
tinnapp	Michael Brackmann	Paid	39.99				Present				Present		Present															Present		Present
TinniTest	四川微迪数字技术有限公司	Paid	2.99				Present				Present			Present
Tinnitus Breaker (Masker)	Hyunmin Park	Paid	1.99	Present			Present				Present							Present															Present						Present				Present
tinnitus	Eigo Miyauchi	Paid	7.99																				Present								Present					Present			Present				Present
tinnitus help	IND-Ingenieurbuero f. Nachrichten- u. Datentechnik	Paid	15.99	Present			Present			Present	Present		Present	Present					Present	Present								Present															Present
Tinnitus HQ: Natural sound masking & filters to relieve ringing in the ears	Phase4 Mobile	Paid	9.99															Present	Present	Present						Present				Present	Present		Present										Present
Tinnitus Music Trainer	danubeteam	Paid	2.99				Present																					Present												Present
Tinnitus Tamer	VAVsoft	Paid	34.99	Present														Present					Present										Present	Present			Present						Present
Tinnitus Therapy Pro	Sound-Oasis	Paid	5.99															Present	Present	Present					Present								Present					Present					Present
Tinnitus Treatment - How to Treat Tinnitus and Ringing in Ears	Lim Ching Kong	Paid	0.99	Present
White Noise	TMSOFT	Paid	0.99															Present	Present	Present		Present			Present			Present		Present	Present		Present	Present	Present					Present	Present		Present		Present
Tinnitus Advice and Tips	Nick Lim	Paid	0.99
Tone Generator_Pro	michael heinz	Paid	0.99	Present			Present				Present							Present
ABC of Ear, Nose and Throat, 6th Edition	MedHand – Mobile Libraries	Paid	36.99	Present
Octave Band Noise Generator	TOON LLC	Paid	1.99															Present															Present						Present				Present			Present	Present
TinyTinni- tinnitus alleviation	Sergey Ilchenko	Paid	17.99
TinnitusOFF	Core Interface	Paid	24.99	Present			Present		Present				Present													Present		Present					Present							Present	Present	Present		Present
Sleep Pillow White Noise Sound	FITNESS22 LTD	Paid	2.99															Present	Present	Present	Present				Present						Present	Present	Present										Present
[truncated: 1 more columns]
